# Supplementary material for: La grata edad ingrata
Source: MDPI journal article supplement (doi:10.3390/nu14163403), 2002-01-01

**Figure 1.** Products used in the study

**1. First evaluation**

**1a. Salty snacks**

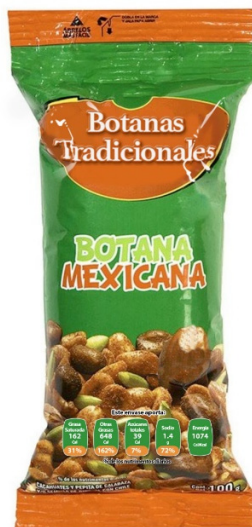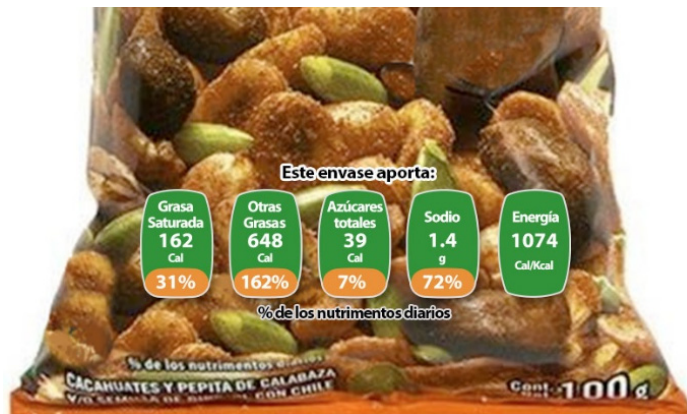

**1b. Ready-to-eat cereal**

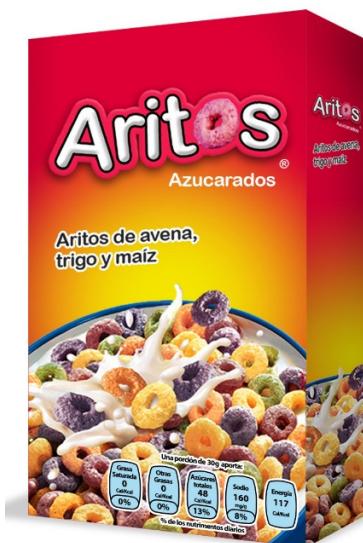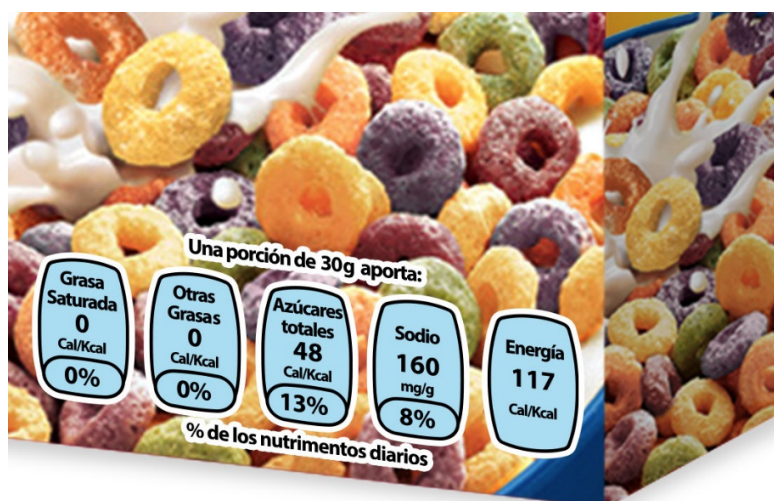

## 1c. Sugar Sweet Beverage

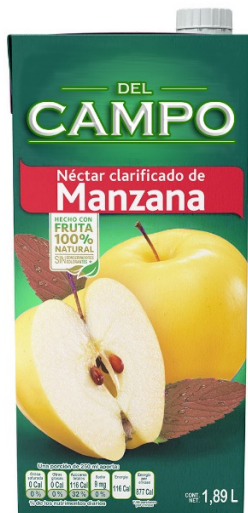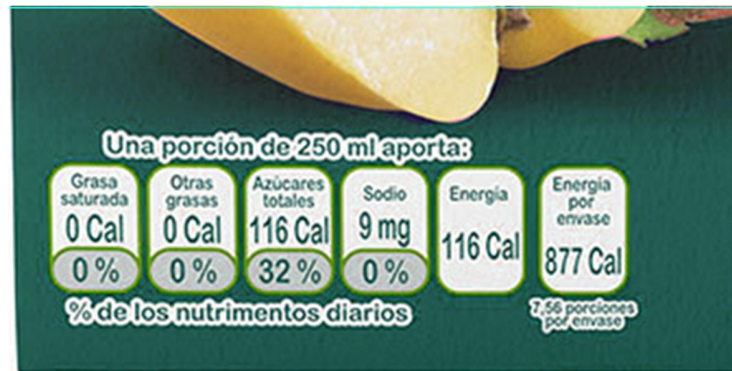

## 1d. Dairy

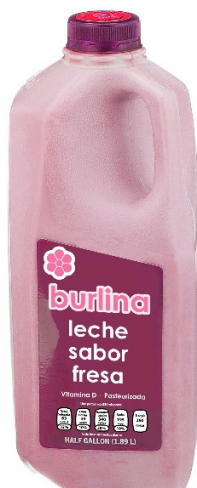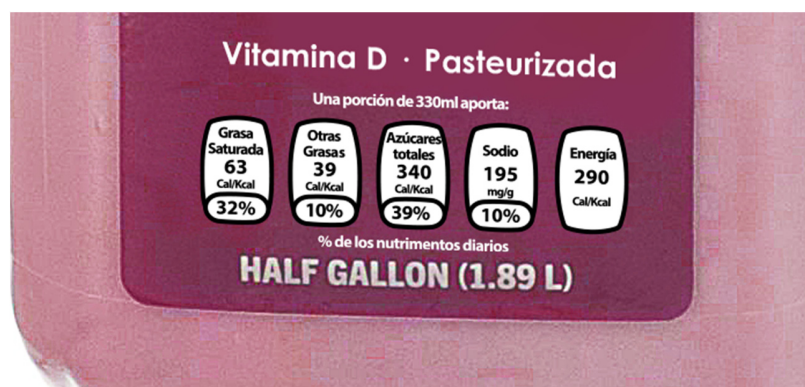



## 1e. Ready-to-eat Food

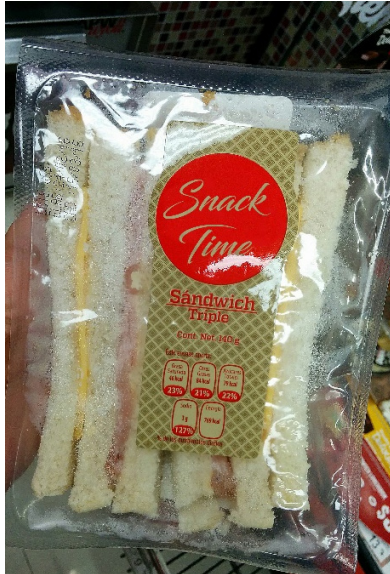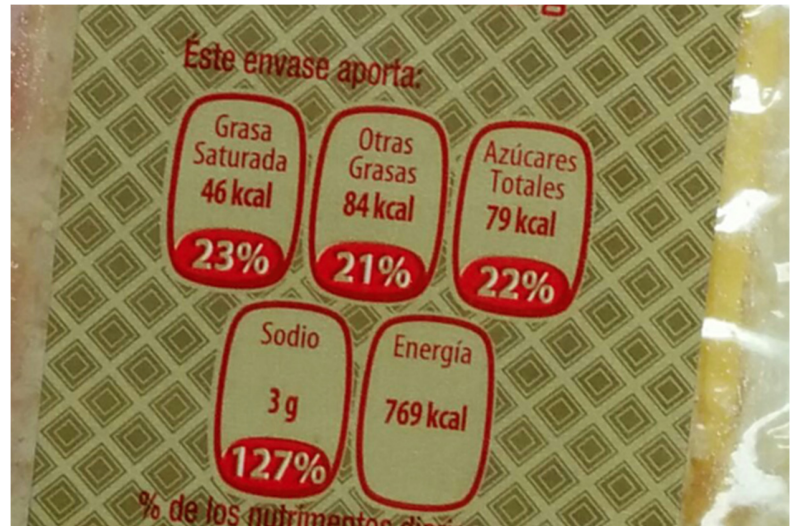

## 2. Second Evaluation

### 2a. Salty snacks

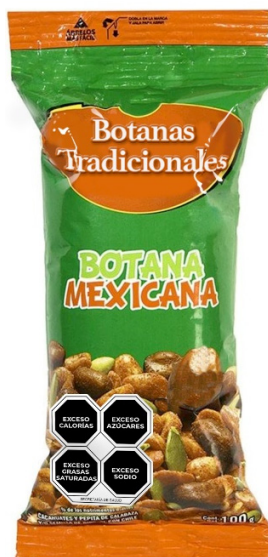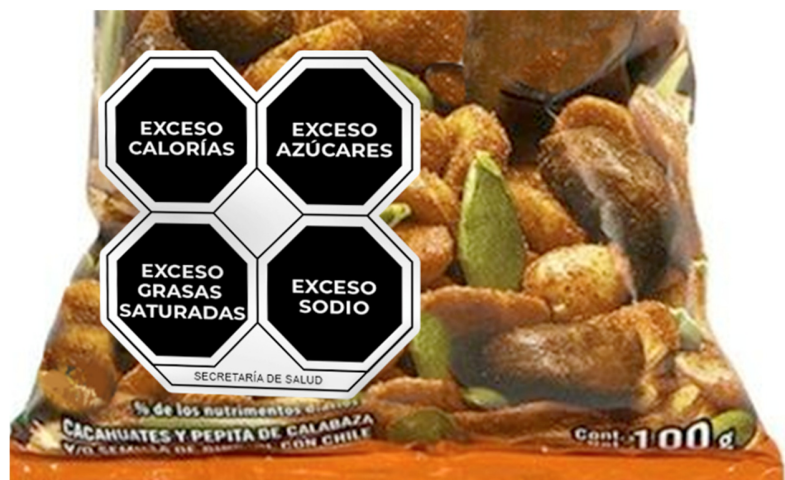

## 2b. Ready-to-eat cereal

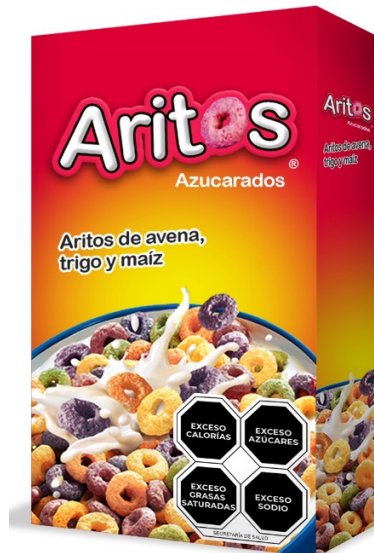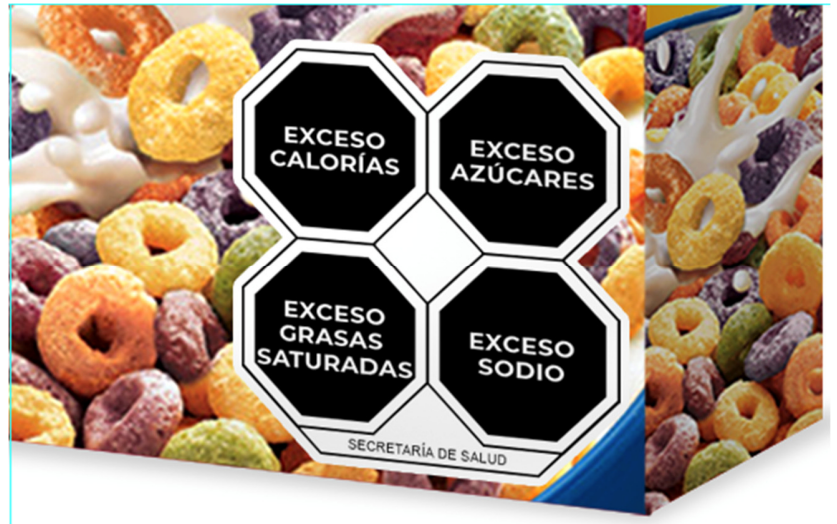

## 3c. Sugar Sweet Beverage

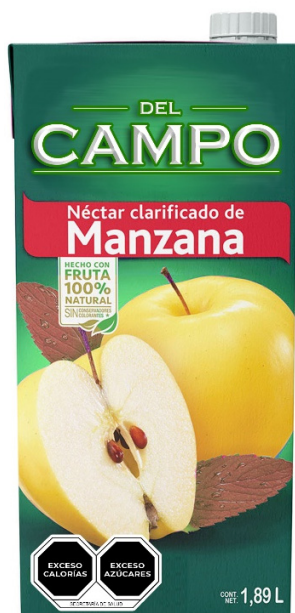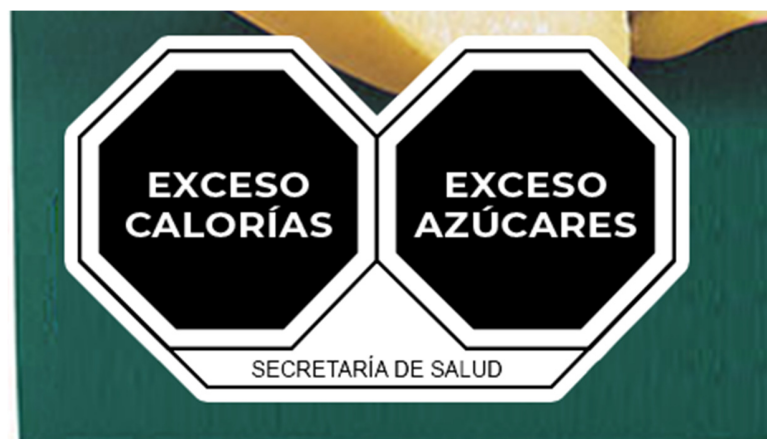



## 2d. Dairy

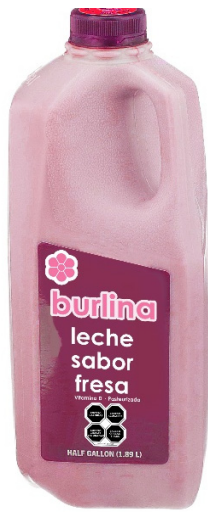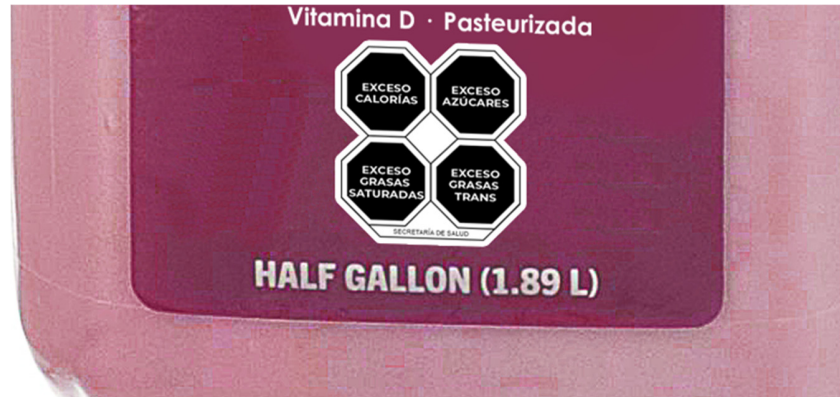

## 2e. Ready-to-eat Food

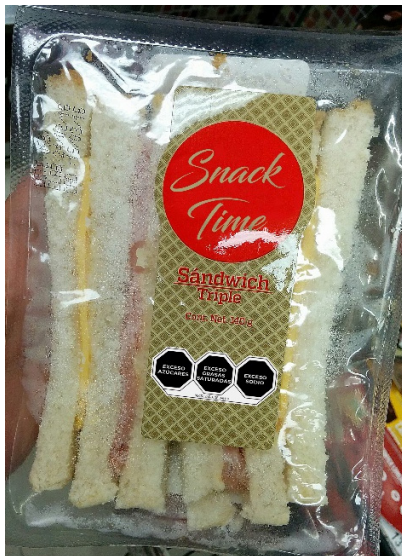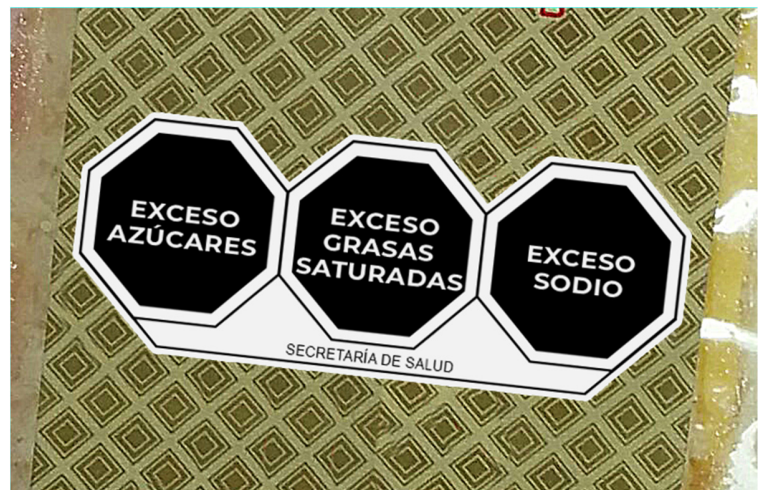

Supplement: s1 [file s1]
