# Supplementary material for: La grata edad ingrata
Source: MDPI journal article supplement (doi:10.3390/nu14163403), 2002-01-01
Supplement: s1 [file s1]

## **FULL QUESTIONNAIRE**

### **Part 1. WELCOME**

#### **Dear participant**

Hoping you are doing well, it is a pleasure to have your participation to complete this online survey of the project "*Potential results and effects of the implementation of Warning Labeling (NOM-051) in Mexican consumers*". Your answers in this study will be very valuable in food and nutrition policies in the country.

We appreciate your time in answering it.

Any questions or concerns in this regard do not hesitate to write to:

PhD. Ismael Campos, researcher responsible for the project

Mail. [icampos@insp.mx](mailto:icampos@insp.mx)

cPhD Jorge Vargas, co-investigator and general coordinator of the project

Mail. [jorge.vargas@insp.mx](mailto:jorge.vargas@insp.mx)

Receive a cordial greeting

*[Informed consent must have been shown beforehand. Upon accepting the consent, the participant must fill out a socio-demographic and nutrition questionnaire prior to the label questions]*

## Part 2. GENERAL QUESTIONS AND NUTRITION QUESTIONNAIRE

**Instructions.** Check the box according to the appropriate answer option:

| QUESTIONS                                                              | ANSWERS                                                                                                                                                                                                                                                                                                                                                                                                                                                                                                                                                                |
|------------------------------------------------------------------------|------------------------------------------------------------------------------------------------------------------------------------------------------------------------------------------------------------------------------------------------------------------------------------------------------------------------------------------------------------------------------------------------------------------------------------------------------------------------------------------------------------------------------------------------------------------------|
| <b>1. Sex</b>                                                          | <input type="checkbox"/> Feminine<br><input type="checkbox"/> Male                                                                                                                                                                                                                                                                                                                                                                                                                                                                                                     |
| <b>1.1 Sex of your child</b> (if applicable)                           | <input type="checkbox"/> Feminine<br><input type="checkbox"/> Male                                                                                                                                                                                                                                                                                                                                                                                                                                                                                                     |
| <b>2. Date of birth of the participating adult</b>                     | <i>["DD/MM/YYYY"]</i>                                                                                                                                                                                                                                                                                                                                                                                                                                                                                                                                                  |
| <b>2.1 Date of Birth of the child</b><br>(if apply)                    | <i>["DD/MM/YYYY"]</i>                                                                                                                                                                                                                                                                                                                                                                                                                                                                                                                                                  |
| <b>3 What is your current weight ?</b>                                 | <i>[Put option to put your weight in kilograms]</i>                                                                                                                                                                                                                                                                                                                                                                                                                                                                                                                    |
| <b>3 What is the height of you ?</b>                                   | <i>[Put option to put your height in centimeters ]</i>                                                                                                                                                                                                                                                                                                                                                                                                                                                                                                                 |
| <b>3.1 What is your child's current weight?</b><br>(if apply)          | <i>[Put option to put your weight in kilograms]</i>                                                                                                                                                                                                                                                                                                                                                                                                                                                                                                                    |
| <b>3.2 How tall is your child?</b> (if apply)                          | <i>[Put option to put your height in centimeters ]</i>                                                                                                                                                                                                                                                                                                                                                                                                                                                                                                                 |
| <b>4. Marital Status</b>                                               | <input type="checkbox"/> Single<br><input type="checkbox"/> Married<br><input type="checkbox"/> divorced / separated<br><input type="checkbox"/> Free Union<br><input type="checkbox"/> Widower                                                                                                                                                                                                                                                                                                                                                                        |
| <b>5 Last level of education (last grade of studies you finished):</b> | <input type="checkbox"/> None<br><input type="checkbox"/> Preschool<br><input type="checkbox"/> Incomplete Primary<br><input type="checkbox"/> Complete Primary<br><input type="checkbox"/> Secondary incomplete<br><input type="checkbox"/> Secondary complete<br><input type="checkbox"/> Preparatory incomplete<br><input type="checkbox"/> Preparatory complete<br><input type="checkbox"/> Bachelor's degree incomplete<br><input type="checkbox"/> Bachelor's degree complete<br><input type="checkbox"/> Postgraduate<br><input type="checkbox"/> Does not know |

|                                                                                                                                                                      |                                                                                                                                                                                                                                                                                      |
|----------------------------------------------------------------------------------------------------------------------------------------------------------------------|--------------------------------------------------------------------------------------------------------------------------------------------------------------------------------------------------------------------------------------------------------------------------------------|
|                                                                                                                                                                      | <input type="checkbox"/> does not answer                                                                                                                                                                                                                                             |
| <b>6. How many full bathrooms with shower and toilet (toilet) does your home have?</b>                                                                               | <input type="checkbox"/> 0) 0 ( None bath complete )<br><input type="checkbox"/> 1) 1 Bathroom complete<br><input type="checkbox"/> 2) 2 or more toilets complete<br><input type="checkbox"/> 99) Don't know<br><input type="checkbox"/> 88) No answer                               |
| <b>8. How many cars or trucks do you have in your household, including closed, cab, or box trucks?</b>                                                               | <input type="checkbox"/> 0) 0<br><input type="checkbox"/> eleven<br><input type="checkbox"/> 2) 2 or more<br><input type="checkbox"/> 99) Don't know<br><input type="checkbox"/> 88) No answer                                                                                       |
| <b>9. Without taking into account the mobile connection you could have from a cell phone, does your home have WIFI internet?</b>                                     | <input type="checkbox"/> 0) Does not have<br><input type="checkbox"/> 1) If you have<br><input type="checkbox"/> 99) Don't know<br><input type="checkbox"/> 88) No answer                                                                                                            |
| <b>10. Of all the people aged 14 or over who live in the household, how many worked in the last month?</b>                                                           | <input type="checkbox"/> 0) 0<br><input type="checkbox"/> eleven<br><input type="checkbox"/> 2) 2<br><input type="checkbox"/> 3) 3<br><input type="checkbox"/> 4) 4 or more<br><input type="checkbox"/> 99) Don't know<br><input type="checkbox"/> 88) No answer                     |
| <b>11. In your home, how many rooms are used for sleeping, not counting hallways or bathrooms?</b>                                                                   | <input type="checkbox"/> 0) 0<br><input type="checkbox"/> eleven<br><input type="checkbox"/> 2) 2<br><input type="checkbox"/> 3) 3<br><input type="checkbox"/> 4) 4 or more<br><input type="checkbox"/> 99) Don't know<br><input type="checkbox"/> 88) No answer                     |
| <b>12. Occupation</b>                                                                                                                                                | <input type="checkbox"/> jobless _<br><input type="checkbox"/> Student<br><input type="checkbox"/> Home house<br><input type="checkbox"/> Domestic<br><input type="checkbox"/> Employee<br><input type="checkbox"/> Businessman<br><input type="checkbox"/> Other : _____            |
| <b>13 Has a doctor, nurse, or nutritionist told you that you suffer or have suffered from:</b><br><br><i>[Caption: "You can select more than one answer option"]</i> | <input type="checkbox"/> diabetes or sugar elevated<br><input type="checkbox"/> Hypertension or pressure high<br><input type="checkbox"/> Overweight<br><input type="checkbox"/> Obesity<br><input type="checkbox"/> high cholesterol<br><input type="checkbox"/> high triglycerides |
| <b>14. Has a doctor, nurse, or nutritionist told you that your child suffers or has suffered from:</b><br>(if apply)                                                 | <input type="checkbox"/> diabetes or sugar elevated<br><input type="checkbox"/> Hypertension or pressure high<br><input type="checkbox"/> Overweight                                                                                                                                 |

|                                                                                                                                                                                                                                                                                                            |                                                                                                                                                                                                                                                                                                                                                            |
|------------------------------------------------------------------------------------------------------------------------------------------------------------------------------------------------------------------------------------------------------------------------------------------------------------|------------------------------------------------------------------------------------------------------------------------------------------------------------------------------------------------------------------------------------------------------------------------------------------------------------------------------------------------------------|
| <p><i>[Caption: "You can select more than one answer option"]</i></p>                                                                                                                                                                                                                                      | <input type="checkbox"/> Obesity<br><input type="checkbox"/> high cholesterol<br><input type="checkbox"/> high triglycerides                                                                                                                                                                                                                               |
| <p><b>15. Monthly household income</b><br/>         (Over 18 years old inside the home)</p> <p><i>[Legend: "Amount in pesos"]</i></p>                                                                                                                                                                      | <p><i>[Legend: "\$_____.Mexican pesos"]</i></p>                                                                                                                                                                                                                                                                                                            |
| <p><b>16. How much do you think you know about nutrition?</b></p>                                                                                                                                                                                                                                          | <input type="checkbox"/> I don't know anything about nutrition<br><input type="checkbox"/> I only know a little about nutrition<br><input type="checkbox"/> I know more or less about nutrition<br><input type="checkbox"/> I know too much on nutrition                                                                                                   |
| <p><b>17. How often do you shop for food or groceries for the household?</b></p>                                                                                                                                                                                                                           | <input type="checkbox"/> Never<br><input type="checkbox"/> Almost never<br><input type="checkbox"/> sometimes _<br><input type="checkbox"/> Almost forever<br><input type="checkbox"/> Always<br><input type="checkbox"/> I don't know                                                                                                                     |
| <p><b>18. How often do you shop <u>online</u> for food or home groceries?</b></p>                                                                                                                                                                                                                          | <input type="checkbox"/> Never<br><input type="checkbox"/> Almost never<br><input type="checkbox"/> sometimes _<br><input type="checkbox"/> Almost forever<br><input type="checkbox"/> Always<br><input type="checkbox"/> I don't know                                                                                                                     |
| <p><b>19. How much do you spend on average in a week on food or groceries for your household? What is the percentage of spending you spend on buying packaged food</b></p>                                                                                                                                 | <input type="checkbox"/> Less than \$300 pesos<br><input type="checkbox"/> Between \$300 and \$500 pesos<br><input type="checkbox"/> Between \$500 and \$1,000 pesos<br><input type="checkbox"/> Between \$1,000 and \$1,500 pesos<br><input type="checkbox"/> More than \$1500 pesos<br><input type="checkbox"/> I don't know<br><input type="checkbox"/> |
| <p><b>20. Do you use or have you used the nutritional front label of packaged foods and beverages?</b></p>                                                                                                                                                                                                 | <input type="checkbox"/> Yes (go to question 21)<br><input type="checkbox"/> No (continue)                                                                                                                                                                                                                                                                 |
| <p><b>20.1 Why do you not use nutrition labels on the packaging of packaged foods and bottled beverages?</b></p> <p>0) You don't have time 1) You don't care 2) You can't see them 3) You don't trust them</p> <p>4) Does not understand 5) Does not consider them useful 6) Other (Write here): _____</p> |                                                                                                                                                                                                                                                                                                                                                            |
| <p><b>21. When you are deciding whether to buy a new food or drink, that is, something you have not bought before, what do you look <u>for</u> when deciding to buy it?</b></p> <p><i>[More than one option can be selected]</i></p> <p>1) In the brand or product name</p>                                |                                                                                                                                                                                                                                                                                                                                                            |

- 2) In the price
- 3) In the characters on the packaging or promotions such as gifts or raffles
- 4) Product promotions (type 2 for 1, give away another product, etc.)
- 5) Because of the nutritional labeling that comes on the front of the wrapper (container)
- 6) For the information on the back of the wrapper (container) that describes the nutritional information (Table).
- 7) For the information on the back of the wrapper (container) that describes the ingredients.
- 8) In what your friends, relatives or friends of your child buy or consume
- 9) In that it is recommended by a health professional (nutritionist, doctor, other)
- 10) It is recommended by an influencer , blogger, youtuber , etc. (something I saw on social networks)
- 11) When you see it on TV
- 12) Other reasons (Write here): \_\_\_\_\_
- 99) Don't know/doesn't answer

**22.1 Select the 3 most important (if applicable):**

1. \_\_\_\_\_
- two. \_\_\_\_\_
3. \_\_\_\_\_

**Part 3. FRONT OF PACK LABELING SCHEME**

*[First Evaluation: GDA label. Second Evaluation: Warning label.]*

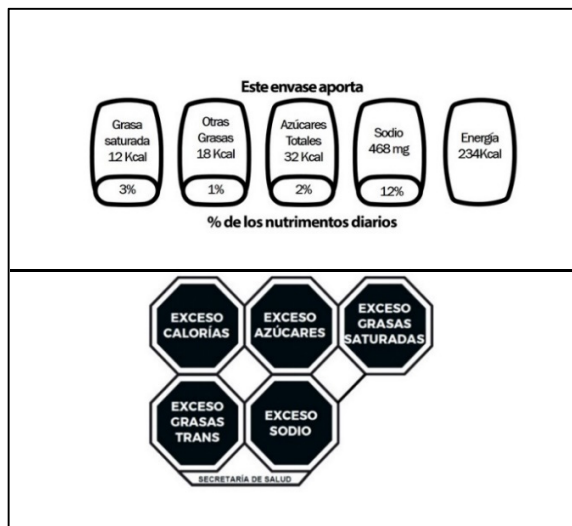

**Instructions.** According to the picture of FRONT NUTRIENT LABELING shown, select the answer option that best corresponds to your opinion:

**4.1 In your opinion, how often should a product with this label be consumed?**  
Where 1 is not likely and 7 is very likely:

○ 1 2 3 4 5 6 7

NO PROBABLE MUY PROBABLE

○  
**1**

○  
**2**

○  
**3**

○  
**4**

○  
**5**

○  
**6**

○  
**7**

En pequeñas cantidades

En grandes cantidades

| 4. 4 The product label catches my attention... |                       |                       |                                      |                       |                       |                          |
|------------------------------------------------|-----------------------|-----------------------|--------------------------------------|-----------------------|-----------------------|--------------------------|
| <input type="radio"/>                          | <input type="radio"/> | <input type="radio"/> | <input type="radio"/>                | <input type="radio"/> | <input type="radio"/> | <input type="radio"/>    |
| <b>1</b>                                       | <b>2</b>              | <b>3</b>              | <b>4</b>                             | <b>5</b>              | <b>6</b>              | <b>7</b>                 |
| Totalmente en<br>desacuerdo                    | Muy en<br>desacuerdo  | Algo en<br>desacuerdo | Ni de acuerdo<br>ni en<br>desacuerdo | Algo de<br>acuerdo    | Muy de<br>acuerdo     | Totalmente de<br>acuerdo |

#### 4.5 The product label is not visible

| 1                        | 2                 | 3                  | 4                              | 5               | 6              | 7                     |
|--------------------------|-------------------|--------------------|--------------------------------|-----------------|----------------|-----------------------|
| Totalmente en desacuerdo | Muy en desacuerdo | Algo en desacuerdo | Ni de acuerdo ni en desacuerdo | Algo de acuerdo | Muy de acuerdo | Totalmente de acuerdo |

---

#### 4.6 This label is easy to understand

| <input type="radio"/>    | <input type="radio"/> | <input type="radio"/> | <input type="radio"/>          | <input type="radio"/> | <input type="radio"/> | <input type="radio"/> |
|--------------------------|-----------------------|-----------------------|--------------------------------|-----------------------|-----------------------|-----------------------|
| 1                        | 2                     | 3                     | 4                              | 5                     | 6                     | 7                     |
| Totalmente en desacuerdo | Muy en desacuerdo     | Algo en desacuerdo    | Ni de acuerdo ni en desacuerdo | Algo de acuerdo       | Muy de acuerdo        | Totalmente de acuerdo |

---

#### 4.7 This label will help me quickly decide which products to buy

| <input type="radio"/>    | <input type="radio"/> | <input type="radio"/> | <input type="radio"/>          | <input type="radio"/> | <input type="radio"/> | <input type="radio"/> |
|--------------------------|-----------------------|-----------------------|--------------------------------|-----------------------|-----------------------|-----------------------|
| 1                        | 2                     | 3                     | 4                              | 5                     | 6                     | 7                     |
| Totalmente en desacuerdo | Muy en desacuerdo     | Algo en desacuerdo    | Ni de acuerdo ni en desacuerdo | Algo de acuerdo       | Muy de acuerdo        | Totalmente de acuerdo |

---

#### 4.8 I think this label will not help me identify healthier foods

| <input type="radio"/>    | <input type="radio"/> | <input type="radio"/> | <input type="radio"/>          | <input type="radio"/> | <input type="radio"/> | <input type="radio"/> |
|--------------------------|-----------------------|-----------------------|--------------------------------|-----------------------|-----------------------|-----------------------|
| 1                        | 2                     | 3                     | 4                              | 5                     | 6                     | 7                     |
| Totalmente en desacuerdo | Muy en desacuerdo     | Algo en desacuerdo    | Ni de acuerdo ni en desacuerdo | Algo de acuerdo       | Muy de acuerdo        | Totalmente de acuerdo |

---

#### 4.9 This label will help me decide whether or not to buy a product

| <input type="radio"/>    | <input type="radio"/> | <input type="radio"/> | <input type="radio"/>          | <input type="radio"/> | <input type="radio"/> | <input type="radio"/> |
|--------------------------|-----------------------|-----------------------|--------------------------------|-----------------------|-----------------------|-----------------------|
| 1                        | 2                     | 3                     | 4                              | 5                     | 6                     | 7                     |
| Totalmente en desacuerdo | Muy en desacuerdo     | Algo en desacuerdo    | Ni de acuerdo ni en desacuerdo | Algo de acuerdo       | Muy de acuerdo        | Totalmente de acuerdo |

---

#### 4.10 I believe that the information on this label is credible and true

|                             |                       |                       |                                      |                       |                       |                          |
|-----------------------------|-----------------------|-----------------------|--------------------------------------|-----------------------|-----------------------|--------------------------|
| <input type="radio"/>       | <input type="radio"/> | <input type="radio"/> | <input type="radio"/>                | <input type="radio"/> | <input type="radio"/> | <input type="radio"/>    |
| <b>1</b>                    | <b>2</b>              | <b>3</b>              | <b>4</b>                             | <b>5</b>              | <b>6</b>              | <b>7</b>                 |
| Totalmente en<br>desacuerdo | Muy en<br>desacuerdo  | Algo en<br>desacuerdo | Ni de acuerdo<br>ni en<br>desacuerdo | Algo de<br>acuerdo    | Muy de<br>acuerdo     | Totalmente de<br>acuerdo |

---

#### 4.11 This label will not change my decision about which products to buy

|                             |                       |                       |                                      |                       |                       |                          |
|-----------------------------|-----------------------|-----------------------|--------------------------------------|-----------------------|-----------------------|--------------------------|
| <input type="radio"/>       | <input type="radio"/> | <input type="radio"/> | <input type="radio"/>                | <input type="radio"/> | <input type="radio"/> | <input type="radio"/>    |
| <b>1</b>                    | <b>2</b>              | <b>3</b>              | <b>4</b>                             | <b>5</b>              | <b>6</b>              | <b>7</b>                 |
| Totalmente en<br>desacuerdo | Muy en<br>desacuerdo  | Algo en<br>desacuerdo | Ni de acuerdo<br>ni en<br>desacuerdo | Algo de<br>acuerdo    | Muy de<br>acuerdo     | Totalmente de<br>acuerdo |

#### Part 4. QUESTIONS FOR PRODUCTS WITH FRONT OTF PACK LABELLING.

*[Figure S1. First Evaluation: Five products with GDA label. Second Evaluation: Five products with Warning label.]*

- I. **Instructions.** The photo on the left side shows the front of a product. At the bottom of it, there is a front label that contains nutritional information.
- II. **The photo on the right shows the front labeling of this product.**

**According to the product and its front labeling, answer the following questions:**

---

#### 3.1 How attractive is the product for consumption?

*Where 1 is unattractive and 7 is very attractive:*

|                       |                       |                       |                       |                       |                       |                       |
|-----------------------|-----------------------|-----------------------|-----------------------|-----------------------|-----------------------|-----------------------|
| <input type="radio"/> |
| <b>1</b>              | <b>2</b>              | <b>3</b>              | <b>4</b>              | <b>5</b>              | <b>6</b>              | <b>7</b>              |
| Poco<br>atractivo     |                       |                       |                       |                       |                       | Muy<br>atractivo      |

---

#### 3.2 How healthy is the product?

*Where 1 is unhealthy and 7 is very healthy:*



|                       |                       |                       |                       |                       |                       |                       |
|-----------------------|-----------------------|-----------------------|-----------------------|-----------------------|-----------------------|-----------------------|
| <input type="radio"/> |
| <b>1</b>              | <b>2</b>              | <b>3</b>              | <b>4</b>              | <b>5</b>              | <b>6</b>              | <b>7</b>              |
| No<br>Saludable       |                       |                       |                       |                       |                       | Muy<br>Saludable      |

---

**3.3 Would you buy this product for yourself or your family?**

*Where 1 is not likely and 7 is very likely:*

|                       |                       |                       |                       |                       |                       |                       |
|-----------------------|-----------------------|-----------------------|-----------------------|-----------------------|-----------------------|-----------------------|
| <input type="radio"/> |
| <b>1</b>              | <b>2</b>              | <b>3</b>              | <b>4</b>              | <b>5</b>              | <b>6</b>              | <b>7</b>              |
| NO PROBABLE           |                       |                       |                       |                       |                       | MUY<br>PROBABLE       |

---

**3.4 How often would you buy this product for yourself or your child?**

|                       |                       |                        |                           |                                |                       |                             |
|-----------------------|-----------------------|------------------------|---------------------------|--------------------------------|-----------------------|-----------------------------|
| <input type="radio"/> | <input type="radio"/> | <input type="radio"/>  | <input type="radio"/>     | <input type="radio"/>          | <input type="radio"/> | <input type="radio"/>       |
| <b>1</b>              | <b>2</b>              | <b>3</b>               | <b>4</b>                  | <b>5</b>                       | <b>6</b>              | <b>7</b>                    |
| Casi<br>nunca         | Una vez<br>al mes     | Dos<br>veces al<br>mes | Una vez<br>a la<br>semana | Varias<br>veces a la<br>semana | Todos<br>los días     | Más de<br>una vez<br>al día |

---

**3.5 Does the front labeling of this product give you enough information to determine if it is healthy?**

- a) Not informative enough
- b) It is informative
- c) It is sufficiently informative
- d) I don't know
- e) Refused to answer

---

**3.6 In general, does front labeling make you feel...?**

- a) LESS confident or able to decide if the product is healthy
- b) NEITHER MORE NOR LESS sure or able to decide if the product is healthy
- c) MORE confident or able to decide if the product is healthy
- d) I don't know
- e) Refuse to answer

**3.7 In your opinion, in this product, which nutrient or nutrients are found in high amounts or higher than those recommended for a healthy diet? You can select more than one option**

- 1) fats
- 2) sugars
- 3) Energy/ Calories
- 4) Sodium
- 5) None of these nutrients are high or above

[Questions for the Second Evaluation]

## Part 5a. SWEETENERS DISCLAIMER

**Instructions.** The next questions are about **sweeteners**. [Read: “A sweetener is a product used to sweeten foods and beverages in replacement or substitution of sugar. These have no calories and those that do have are very few compared to sugar. Some known ones are Stevia, splenda etc.”]. When packaged foods and beverages have added sweeteners, the following disclaimer appears:

**CONTIENE EDULCORANTES, NO RECOMENDABLE EN NIÑOS**

**5.1 What would you do if you saw this disclaimer on a product that you usually buy?**

- ○ ○ ○ ○ ○ ○
- 1 2 3 4 5 6 7**

No lo compraría

Continuaría  
comprándolo

**5.2 This disclaimer will help me decide whether or not to buy a product**

- ○ ○ ○ ○ ○ ○

| 1                        | 2                 | 3                  | 4                              | 5               | 6              | 7                     |
|--------------------------|-------------------|--------------------|--------------------------------|-----------------|----------------|-----------------------|
| Totalmente en desacuerdo | Muy en desacuerdo | Algo en desacuerdo | Ni de acuerdo ni en desacuerdo | Algo de acuerdo | Muy de acuerdo | Totalmente de acuerdo |

---

**5.3 How often would you give a product with this disclaimer to a child (if I had: my son or daughter)?**

|                       |                       |                       |                       |                          |                       |                       |
|-----------------------|-----------------------|-----------------------|-----------------------|--------------------------|-----------------------|-----------------------|
| <input type="radio"/>    | <input type="radio"/> | <input type="radio"/> |
| <b>1</b>              | <b>2</b>              | <b>3</b>              | <b>4</b>              | <b>5</b>                 | <b>6</b>              | <b>7</b>              |
| Casi nunca            | Una vez al mes        | Dos veces al mes      | Una vez a la semana   | Varias veces a la semana | Todos los días        | Más de una vez al día |

---

**5.4 In your opinion, in what quantities should a product with this disclaimer be consumed?**

*Where 1 is less and 7 if the amount is greater:*

|                        |                       |                       |                       |                       |                       |                       |
|------------------------|-----------------------|-----------------------|-----------------------|-----------------------|-----------------------|-----------------------|
| <input type="radio"/>  | <input type="radio"/> | <input type="radio"/> | <input type="radio"/> | <input type="radio"/> | <input type="radio"/> | <input type="radio"/> |
| <b>1</b>               | <b>2</b>              | <b>3</b>              | <b>4</b>              | <b>5</b>              | <b>6</b>              | <b>7</b>              |
| En pequeñas cantidades |                       |                       |                       |                       |                       | En grandes cantidades |

---

**5.5 How severe is the disclaimer that is in front of the product?**

- a) Not severe enough
- b) correct
- c) too hard
- d) I don't know
- e) Refused to answer

**Part 5b. CAFFEINE DISCLAIMER**

**Instructions.** Lastly, the next questions are about **caffeine**. [Read: "Caffeine is a bitter substance found naturally in different plants, such as coffee beans and tea leaves. Caffeine is primarily used in foods and beverages to flavor, fix flavor, as well as add color to foods.

When packaged foods and beverages have caffeine in their ingredients, the following disclaimer appears:

## CONTIENE CAFEÍNA EVITAR EN NIÑOS

6.1 What would you do if you saw this disclaimer on a product that you usually buy?

- ☐ 1      ☐ 2      ☐ 3      ☐ 4      ☐ 5      ☐ 6      ☐ 7

No lo  
compraría

Continuaría  
comprándolo

6.2 This disclaimer will help me decide whether or not to buy a product

- ☐ 1      ☐ 2      ☐ 3      ☐ 4      ☐ 5      ☐ 6      ☐ 7

Totalmente en  
desacuerdo

Muy en  
desacuerdo

Algo en  
desacuerdo

Ni de acuerdo  
ni en  
desacuerdo

Algo de  
acuerdo

Muy de  
acuerdo

Totalmente de  
acuerdo

6.3 How often would you give a product with this disclaimer to a child (if I had: my son or daughter)?

- ☐ 1      ☐ 2      ☐ 3      ☐ 4      ☐ 5      ☐ 6      ☐ 7

Casi  
nunca

Una vez  
al mes

Dos  
veces al  
mes

Una vez  
a la  
semana

Varias  
veces a la  
semana

Todos  
los días

Más de  
una vez  
al día

6.4 In your opinion, in what quantities should a product with this disclaimer be consumed?

*Where 1 is less and 7 if the amount is greater:*

- ☐ 1      ☐ 2      ☐ 3      ☐ 4      ☐ 5      ☐ 6      ☐ 7

En pequeñas  
cantidades

En grandes  
cantidades

6.5 How severe is the disclaimer that is in front of the product?

- a) Not severe enough
- b) correct
- c) too hard
- d) I don't know
- e) Refused to answer

**Part. 6. FINAL**

We appreciate your collaboration in filling out this questionnaire. The information you provide us will be very valuable for the implementation of public policies that promote healthy eating. As I mentioned at the beginning, you will be sent infographics with recommendations from nutrition experts that will help you choose healthier packaged foods.
