# Supplementary material for: La grata edad ingrata
Source: MDPI journal article supplement (doi:10.3390/nu14163403), 2002-01-01
Supplement: s1 [file s1]

**Table S2.** Knowledge of sweetener's and perception of the sweetener and caffeine disclaimers (n=1,083)

| <b>Sweetener's disclaimer</b>                                                                                     | <b>%</b> | <b>95%CI</b> |
|-------------------------------------------------------------------------------------------------------------------|----------|--------------|
| Sweeteners are harmful to health (Strongly agree - totally agree)                                                 | 32.3     | 29.6, 35.3   |
| Many of the beverages, sweets, such as sodas and fruit nectars, have sweeteners (Strongly agree - totally agree)  | 52.3     | 49.3, 55.2   |
| Sweeteners allow us to consume fewer calories (Strongly agree - totally agree)                                    | 31.9     | 29.2, 34.8   |
| Boys and girls should not consume foods or drinks with sweeteners (Strongly agree - totally agree)                | 44.9     | 41.9, 47.9   |
| Sweeteners are more harmful than sugar (Strongly agree - totally agree)                                           | 27.8     | 25.2, 30.5   |
| Would you continue to buy a product that contains this disclaimer? (Strongly disagree - totally disagree)         | 46.9     | 43.9, 49.9   |
| This disclaimer will help me decide whether or not to buy a product (Strongly agree - totally agree)              | 51.6     | 48.6, 54.6   |
| How often would you give a product with this disclaimer to a child (if you had a son or daughter)? (almost never) | 73.6     | 70.9, 76.1   |
| In your opinion, in what quantities should a product be consumed with this disclaimer? (Very small quantities)    | 68.9     | 66.1, 71.6   |
| How severe is the disclaimer in front of the product                                                              |          |              |
| Not enough                                                                                                        | 13.5     | 11.6, 15.7   |
| Correct                                                                                                           | 60.8     | 57.8, 63.5   |
| Too hard                                                                                                          | 13.6     | 11.7, 15.7   |
| <b>Caffeine disclaimer</b>                                                                                        |          |              |
| Would you continue to buy a product that contains this disclaimer? (Strongly disagree - totally disagree)         | 42.9     | 40.0, 45.9   |
| This disclaimer will help me decide whether or not to buy a product (Strongly agree - totally agree)              | 47.4     | 44.4, 50.4   |
| How often would you give a product with this disclaimer to a child (if you had a son or daughter)? (almost never) | 81.3     | 78.8, 83.5   |
| In your opinion, in what quantities should a product be consumed with this disclaimer? (Very small quantities)    | 65.1     | 62.2, 67.9   |
| How severe is the disclaimer in front of the product                                                              |          |              |
| Not enough                                                                                                        | 12.9     | 11.1, 15.1   |
| Correct                                                                                                           | 63.6     | 60.7, 66.4   |
| Too hard                                                                                                          | 12.7     | 10.9, 14.9   |

**Table S2a.** Knowledge of sweetener's and perception of the sweetener and caffeine disclaimers according to population group and interest in health. (n=1083)

|                                                                                                                   | Population group       |       |      |                        |       |      |                      |       |      | Interest in own health       |       |      |                 |       |      |                |       |      |
|-------------------------------------------------------------------------------------------------------------------|------------------------|-------|------|------------------------|-------|------|----------------------|-------|------|------------------------------|-------|------|-----------------|-------|------|----------------|-------|------|
|                                                                                                                   | 18 - 25 years<br>n=382 |       |      | 26- 42 years<br>n =329 |       |      | 43-75 years<br>n=372 |       |      | A little-<br>Nothing<br>n=34 |       |      | Enough<br>n=337 |       |      | A lot<br>n=712 |       |      |
|                                                                                                                   | %                      | 95%CI |      | %                      | 95%CI |      | %                    | 95%CI |      | %                            | 95%CI |      | %               | 95%CI |      | %              | 95%CI |      |
| <b>Sweetener's</b>                                                                                                |                        |       |      |                        |       |      |                      |       |      |                              |       |      |                 |       |      |                |       |      |
| Sweeteners are harmful to health (Strongly agree - totally agree)                                                 | 28.5                   | 24.2, | 33.3 | 31.6                   | 26.8, | 36.8 | 36.8                 | 32.1, | 41.9 | 29.4                         | 16.5, | 46.9 | 30.9            | 26.1, | 36.0 | 33.1           | 29.8, | 36.7 |
| Many of the beverages, sweets, such as sodas and fruit nectars, have sweeteners (Strongly agree - totally agree)  | 48.4                   | 43.4, | 53.5 | 52.3                   | 46.9, | 57.6 | 56.2                 | 51.1, | 61.2 | 50.0                         | 33.6, | 66.4 | 51.6            | 46.3, | 56.9 | 52.7           | 49.0, | 56.3 |
| Sweeteners allow us to consume fewer calories (Strongly agree - totally agree)                                    | 28.5                   | 24.2, | 33.3 | 33.1                   | 28.2, | 38.4 | 34.4                 | 29.7, | 39.4 | 26.5                         | 14.2, | 43.8 | 26.7            | 22.2, | 31.7 | 34.7           | 31.3, | 38.3 |
| Boys and girls should not consume foods or drinks with sweeteners (Strongly agree - totally agree)                | 36.1                   | 31.4, | 41.1 | 45.3                   | 40.0, | 50.7 | 53.5                 | 48.4, | 58.5 | 32.4                         | 18.7, | 49.8 | 41.8            | 36.7, | 47.2 | 46.9           | 43.3, | 50.6 |
| Sweeteners are more harmful than sugar (Strongly agree - totally agree)                                           | 23.0                   | 19.1, | 27.5 | 29.5                   | 24.8, | 34.7 | 31.2                 | 26.7, | 36.1 | 29.4                         | 16.5, | 46.9 | 23.1            | 18.9, | 28.0 | 29.9           | 26.7, | 33.4 |
| Would you continue to buy a product that contains this disclaimer? (Strongly disagree - totally disagree)         | 43.7                   | 38.8, | 48.8 | 50.2                   | 44.8, | 55.5 | 47.3                 | 42.3, | 52.4 | 64.7                         | 47.3, | 78.9 | 42.1            | 37.0, | 47.5 | 48.3           | 44.7, | 52.0 |
| This disclaimer will help me decide whether or not to buy a product (Strongly agree - totally agree)              | 42.4                   | 37.5, | 47.4 | 56.8                   | 51.4, | 62.1 | 56.5                 | 51.4, | 61.4 | 61.8                         | 44.4, | 76.5 | 44.2            | 39.0, | 49.6 | 54.6           | 51.0, | 58.3 |
| How often would you give a product with this disclaimer to a child (if you had a son or daughter)? (almost never) | 70.2                   | 65.4, | 74.5 | 73.9                   | 68.8, | 78.3 | 76.9                 | 72.3, | 80.9 | 70.6                         | 53.1, | 83.5 | 72.1            | 67.1, | 76.6 | 74.4           | 71.1, | 77.5 |
| In your opinion, in what quantities should a product be consumed with this disclaimer? (Very small quantities)    | 63.1                   | 58.1, | 67.8 | 73.6                   | 68.5, | 78.1 | 70.7                 | 65.9, | 75.1 | 76.5                         | 59.2, | 87.9 | 66.8            | 61.5, | 71.6 | 69.5           | 66.0, | 72.8 |
| How severe is the disclaimer in front of the product                                                              |                        |       |      |                        |       |      |                      |       |      |                              |       |      |                 |       |      |                |       |      |
| Not enough                                                                                                        | 15.4                   | 12.2, | 19.4 | 12.2                   | 9.0,  | 16.2 | 12.6                 | 9.6,  | 16.4 | 5.9                          | 1.4,  | 21.1 | 13.4            | 10.1, | 17.4 | 13.9           | 11.5, | 16.7 |
| Correct                                                                                                           | 56.5                   | 51.5, | 61.4 | 64.1                   | 58.8, | 69.1 | 62.1                 | 57.0, | 66.9 | 52.9                         | 36.2, | 69.0 | 58.8            | 53.4, | 63.9 | 62.1           | 58.4, | 65.6 |

|                                                                                                                   |            |      |       |      |      |       |      |      |       |      |      |       |      |      |       |      |      |       |      |
|-------------------------------------------------------------------------------------------------------------------|------------|------|-------|------|------|-------|------|------|-------|------|------|-------|------|------|-------|------|------|-------|------|
|                                                                                                                   | Too hard   | 12.8 | 9.8,  | 16.6 | 13.1 | 9.8,  | 17.2 | 14.8 | 11.5, | 18.8 | 26.5 | 14.2, | 43.8 | 13.9 | 10.6, | 18.1 | 12.8 | 10.5, | 15.4 |
| <b>Caffeine disclaimer</b>                                                                                        |            |      |       |      |      |       |      |      |       |      |      |       |      |      |       |      |      |       |      |
| Would you continue to buy a product that contains this disclaimer? (Strongly disagree - totally disagree)         |            | 37.7 | 33.0, | 42.7 | 45.0 | 39.7, | 50.4 | 46.5 | 41.5, | 51.6 | 50.0 | 33.6, | 66.4 | 40.4 | 35.2, | 45.7 | 43.8 | 40.2, | 47.5 |
| This disclaimer will help me decide whether or not to buy a product (Strongly agree - totally agree)              |            | 39.8 | 35.0, | 44.8 | 52.0 | 46.6, | 57.3 | 51.1 | 46.0, | 56.1 | 55.9 | 38.9, | 71.6 | 41.8 | 36.7, | 47.2 | 49.6 | 45.9, | 53.3 |
| How often would you give a product with this disclaimer to a child (if you had a son or daughter)? (almost never) |            | 78.3 | 73.8, | 82.1 | 83.9 | 79.5, | 87.5 | 82.0 | 77.7, | 85.6 | 79.4 | 62.4, | 90.0 | 80.7 | 76.1, | 84.6 | 81.6 | 78.6, | 84.3 |
| In your opinion, in what quantities should a product be consumed with this disclaimer? (Very small quantities)    |            | 58.6 | 53.6, | 63.5 | 69.3 | 64.1, | 74.1 | 68.0 | 63.1, | 72.6 | 79.4 | 62.4, | 90.0 | 62.6 | 57.3, | 67.6 | 65.6 | 62.0, | 69.0 |
| How severe is the disclaimer in front of the product                                                              |            |      |       |      |      |       |      |      |       |      |      |       |      |      |       |      |      |       |      |
|                                                                                                                   | Not enough | 12.8 | 9.8,  | 16.6 | 12.8 | 9.6,  | 16.8 | 13.2 | 10.1, | 17.0 | 8.8  | 2.8,  | 24.4 | 12.8 | 9.6,  | 16.8 | 13.2 | 10.9, | 15.9 |
|                                                                                                                   | Correct    | 63.6 | 58.7, | 68.3 | 65.7 | 60.3, | 70.6 | 61.8 | 56.8, | 66.6 | 58.8 | 41.6, | 74.1 | 63.2 | 57.9, | 68.2 | 64.0 | 60.4, | 67.5 |
|                                                                                                                   | Too hard   | 11.8 | 8.9,  | 15.4 | 10.6 | 7.7,  | 14.5 | 15.6 | 12.2, | 19.7 | 17.6 | 8.0,  | 34.4 | 13.4 | 10.1, | 17.4 | 12.2 | 10.0, | 14.8 |

**Table S2b.** Knowledge of sweetener's and perception of the sweetener and caffeine disclaimers according to academic level. (n=1083)

| Sweetener´s                                                                                                       | Academic level              |       |      |                      |       |      |                                        |       |      |
|-------------------------------------------------------------------------------------------------------------------|-----------------------------|-------|------|----------------------|-------|------|----------------------------------------|-------|------|
|                                                                                                                   | Secondary or lower<br>n=169 |       |      | High school<br>n=359 |       |      | Bachelor's degree or<br>above<br>n=555 |       |      |
|                                                                                                                   | %                           | 95%CI |      | %                    | 95%CI |      | %                                      | 95%CI |      |
| Sweeteners are harmful to health (Strongly agree - totally agree)                                                 | 30.8                        | 24.3, | 38.2 | 32.6                 | 27.9, | 37.6 | 32.6                                   | 28.8, | 36.6 |
| Many of the beverages, sweets, such as sodas and fruit nectars, have sweeteners (Strongly agree - totally agree)  | 44.4                        | 37.0, | 52.0 | 51.8                 | 46.6, | 57.0 | 55.0                                   | 50.8, | 59.1 |
| Sweeteners allow us to consume fewer calories (Strongly agree - totally agree)                                    | 33.1                        | 26.4, | 40.6 | 29.5                 | 25.0, | 34.5 | 33.2                                   | 29.4, | 37.2 |
| Boys and girls should not consume foods or drinks with sweeteners (Strongly agree - totally agree)                | 40.8                        | 33.6, | 48.4 | 43.5                 | 38.4, | 48.6 | 47.0                                   | 42.9, | 51.2 |
| Sweeteners are more harmful than sugar (Strongly agree - totally agree)                                           | 25.4                        | 19.4, | 32.6 | 26.7                 | 22.4, | 31.6 | 29.2                                   | 25.5, | 33.1 |
| Would you continue to buy a product that contains this disclaimer? (Strongly disagree - totally disagree)         | 47.9                        | 40.5, | 55.5 | 47.6                 | 42.5, | 52.8 | 46.1                                   | 42.0, | 50.3 |
| This disclaimer will help me decide whether or not to buy a product (Strongly agree - totally agree)              | 55.0                        | 47.4, | 62.4 | 51.5                 | 46.4, | 56.7 | 50.6                                   | 46.5, | 54.8 |
| How often would you give a product with this disclaimer to a child (if you had a son or daughter)? (almost never) | 68.0                        | 60.6, | 74.7 | 72.1                 | 67.3, | 76.5 | 76.2                                   | 72.5, | 79.6 |
| In your opinion, in what quantities should a product be consumed with this disclaimer? Very small quantities      | 68.0                        | 60.6, | 74.7 | 68.8                 | 63.8, | 73.4 | 69.2                                   | 65.2, | 72.9 |
| How severe is the disclaimer in front of the product                                                              |                             |       |      |                      |       |      |                                        |       |      |
| Not enough                                                                                                        | 14.8                        | 10.2, | 21.0 | 10.6                 | 7.8,  | 14.2 | 15.0                                   | 12.2, | 18.2 |
| Correct                                                                                                           | 53.3                        | 45.7, | 60.7 | 62.1                 | 57.0, | 67.0 | 62.2                                   | 58.0, | 66.1 |

|                                                                                                                   |            |      |            |      |            |      |            |
|-------------------------------------------------------------------------------------------------------------------|------------|------|------------|------|------------|------|------------|
|                                                                                                                   | Too hard   | 16.0 | 11.2, 22.3 | 14.8 | 11.4, 18.8 | 12.1 | 9.6, 15.1  |
| <b>Caffeine disclaimer</b>                                                                                        |            |      |            |      |            |      |            |
| Would you continue to buy a product that contains this disclaimer? (Strongly disagree - totally disagree)         |            | 51.5 | 43.9, 59.0 | 41.2 | 36.2, 46.4 | 41.4 | 37.4, 45.6 |
| This disclaimer will help me decide whether or not to buy a product (Strongly agree - totally agree)              |            | 49.1 | 41.6, 56.6 | 47.9 | 42.8, 53.1 | 46.5 | 42.4, 50.7 |
| How often would you give a product with this disclaimer to a child (if you had a son or daughter)? (almost never) |            | 78.1 | 71.2, 83.7 | 78.6 | 74.0, 82.5 | 84.0 | 80.7, 86.8 |
| In your opinion, in what quantities should a product be consumed with this disclaimer? (Very small quantities)    |            | 71.0 | 63.7, 77.4 | 62.4 | 57.3, 67.3 | 65.0 | 61.0, 68.9 |
| How severe is the disclaimer in front of the product                                                              |            |      |            |      |            |      |            |
|                                                                                                                   | Not enough | 11.8 | 7.7, 17.7  | 10.6 | 7.8, 14.2  | 14.8 | 12.1, 18.0 |
|                                                                                                                   | Correct    | 56.2 | 48.6, 63.5 | 63.8 | 58.7, 68.6 | 65.8 | 61.7, 69.6 |
|                                                                                                                   | Too hard   | 18.9 | 13.7, 25.6 | 13.9 | 10.7, 17.9 | 10.1 | 7.8, 12.9  |

**Table S2c.** Knowledge of sweetener's and perception of the sweetener and caffeine disclamers according to nutrition knowledge.  
(n=1083)

| Sweetener's                                                                                                       | Nutrition knowledge                 |       |      |                   |       |      |                  |       |      |
|-------------------------------------------------------------------------------------------------------------------|-------------------------------------|-------|------|-------------------|-------|------|------------------|-------|------|
|                                                                                                                   | More or less -<br>too much<br>n=433 |       |      | A little<br>n=505 |       |      | Nothing<br>n=145 |       |      |
|                                                                                                                   | %                                   | 95%CI |      | %                 | 95%CI |      | %                | 95%CI |      |
| Sweeteners are harmful to health (Strongly agree - totally agree)                                                 | 33.7                                | 29.4  | 38.3 | 28.7              | 24.9  | 32.8 | 40.7             | 33.0  | 48.9 |
| Many of the beverages, sweets, such as sodas and fruit nectars, have sweeteners (Strongly agree - totally agree)  | 57.3                                | 52.6  | 61.9 | 49.3              | 45.0  | 53.7 | 47.6             | 39.6  | 55.7 |
| Sweeteners allow us to consume fewer calories (Strongly agree - totally agree)                                    | 34.6                                | 30.3  | 39.3 | 28.1              | 24.4  | 32.2 | 37.2             | 29.7  | 45.4 |
| Boys and girls should not consume foods or drinks with sweeteners (Strongly agree - totally agree)                | 46.7                                | 42.0  | 51.4 | 42.6              | 38.3  | 46.9 | 47.6             | 39.6  | 55.7 |
| Sweeteners are more harmful than sugar (Strongly agree - totally agree)                                           | 28.2                                | 24.1  | 32.6 | 25.5              | 21.9  | 29.5 | 34.5             | 27.2  | 42.6 |
| Would you continue to buy a product that contains this disclaimer? (Strongly disagree - totally disagree)         | 46.3                                | 41.6  | 51.0 | 45.3              | 41.0  | 49.6 | 54.5             | 46.3  | 62.4 |
| This disclaimer will help me decide whether or not to buy a product (Strongly agree - totally agree)              | 51.2                                | 46.4  | 55.9 | 53.2              | 48.8  | 57.5 | 47.6             | 39.6  | 55.7 |
| How often would you give a product with this disclaimer to a child (if you had a son or daughter)? (almost never) | 75.0                                | 70.7  | 78.9 | 73.7              | 69.7  | 77.4 | 69.0             | 60.9  | 76.0 |
| In your opinion, in what quantities should a product be consumed with this disclaimer? Very small quantities      | 67.8                                | 63.3  | 72.1 | 69.2              | 65.0  | 73.0 | 71.0             | 63.1  | 77.9 |
| How severe is the disclaimer in front of the product<br>Not enough                                                | 14.6                                | 11.6  | 18.2 | 10.9              | 8.4   | 13.9 | 19.3             | 13.7  | 26.6 |

|          |      |       |      |      |       |      |      |       |      |
|----------|------|-------|------|------|-------|------|------|-------|------|
| Correct  | 64.6 | 59.9, | 69.0 | 59.9 | 55.5, | 64.1 | 52.4 | 44.3, | 60.4 |
| Too hard | 10.0 | 7.5,  | 13.2 | 15.4 | 12.5, | 18.8 | 17.9 | 12.5, | 25.1 |

---

#### Caffeine disclaimer

---

|                                                                                                                   |      |       |      |      |       |      |      |       |      |
|-------------------------------------------------------------------------------------------------------------------|------|-------|------|------|-------|------|------|-------|------|
| Would you continue to buy a product that contains this disclaimer? (Strongly disagree - totally disagree)         | 40.5 | 36.0, | 45.2 | 41.1 | 36.9, | 45.5 | 56.6 | 48.3, | 64.4 |
| This disclaimer will help me decide whether or not to buy a product (Strongly agree - totally agree)              | 46.3 | 41.6, | 51.0 | 48.8 | 44.5, | 53.2 | 45.5 | 37.6, | 53.7 |
| How often would you give a product with this disclaimer to a child (if you had a son or daughter)? (almost never) | 82.6 | 78.8, | 85.9 | 81.6 | 78.0, | 84.8 | 75.9 | 68.2, | 82.2 |
| In your opinion, in what quantities should a product be consumed with this disclaimer? (Very small quantities)    | 64.1 | 59.5, | 68.5 | 63.8 | 59.5, | 67.9 | 72.4 | 64.5, | 79.1 |
| How severe is the disclaimer in front of the product                                                              |      |       |      |      |       |      |      |       |      |
| Not enough                                                                                                        | 15.0 | 12.0, | 18.7 | 10.5 | 8.1,  | 13.5 | 15.2 | 10.2, | 22.0 |
| Correct                                                                                                           | 65.5 | 60.9, | 69.9 | 64.0 | 59.7, | 68.1 | 56.6 | 48.3, | 64.4 |
| Too hard                                                                                                          | 9.7  | 7.3,  | 12.9 | 13.6 | 10.9, | 16.9 | 18.6 | 13.1, | 25.8 |

---
