# Supplementary material for: La grata edad ingrata
Source: MDPI journal article supplement (doi:10.3390/nu14163403), 2002-01-01
Supplement: s1 [file s1]

**Table S1.** Changes (%) in perception and subjective understanding among products with GDA and WL by food category<sup>1</sup>.

|                                                                                                                                  | Dairy |            |       |            | Ready-to-eat cereal |            |       |            | Salty snack |            |       |            | Sugar Sweet Beverage |            |      |            | Ready-to-eat Food |            |       |            |
|----------------------------------------------------------------------------------------------------------------------------------|-------|------------|-------|------------|---------------------|------------|-------|------------|-------------|------------|-------|------------|----------------------|------------|------|------------|-------------------|------------|-------|------------|
|                                                                                                                                  | GDA   |            | WL    |            | GDA                 |            | WL    |            | GDA         |            | WL    |            | GDA                  |            | WL   |            | GDA               |            | WL    |            |
|                                                                                                                                  | 95%   |            | 95%   |            | 95%                 |            | 95%   |            | 95%         |            | 95%   |            | 95%                  |            | 95%  |            | 95%               |            | 95%   |            |
|                                                                                                                                  | %     | CI         | %     | CI         | %                   | CI         | %     | CI         | %           | CI         | %     | CI         | %                    | CI         | %    | CI         | %                 | CI         | %     | CI         |
| <b>Perception</b>                                                                                                                |       |            |       |            |                     |            |       |            |             |            |       |            |                      |            |      |            |                   |            |       |            |
| How attractive is the product for consumption? <sup>2</sup> (Attractive or very attractive)                                      | 18.3  | 16.0, 20.6 | 13.8* | 11.8, 15.9 | 39.0*               | 36.1, 41.8 | 17.9* | 15.6, 20.2 | 36.8*       | 34.0, 39.7 | 22.3* | 19.9, 24.8 | 41.6*                | 38.7, 44.6 | 22.6 | 20.1, 25.1 | 11.0*             | 9.1, 12.8  | 6.5*  | 5.0, 7.9   |
| How healthy is the product? <sup>3</sup> (Healthy or very healthy)                                                               | 13.2  | 11.2, 15.3 | 4.8*  | 3.5, 6.1   | 24.5*               | 21.9, 27.0 | 3.8*  | 2.7, 4.9   | 14.2*       | 12.2, 16.3 | 6.1*  | 4.7, 7.5   | 22.2*                | 19.7, 24.6 | 9.2  | 7.5, 10.9  | 9.1*              | 7.4, 10.8  | 4.0*  | 2.8, 5.1   |
| Would you buy this product for yourself or your family? <sup>2</sup> (Unlikely-very unlikely)                                    | 11.9  | 10.0, 13.8 | 6.9*  | 5.4, 8.4   | 30.9*               | 28.2, 33.7 | 10.9* | 9.0, 12.7  | 23.2*       | 20.7, 25.7 | 16.1* | 13.9, 18.3 | 28.4*                | 25.7, 31.0 | 17.3 | 15.0, 19.5 | 9.0*              | 7.4, 10.7  | 4.8*  | 3.5, 6.1   |
| How often would you buy this product for yourself? <sup>2</sup> (once or twice per month or never)                               | 90.0  | 88.3, 91.9 | 94.0* | 92.6, 95.4 | 88.9*               | 87.1, 90.8 | 94.7* | 93.4, 96.1 | 85.0*       | 82.9, 87.1 | 88.3* | 86.4, 90.2 | 74.4*                | 71.9, 77.0 | 80.4 | 78.1, 82.8 | 93.9*             | 92.4, 95.3 | 96.0* | 94.9, 97.2 |
| Does the label of this product provide enough information to determine if it's healthy? <sup>4</sup> (Is not informative enough) | 36.5  | 33.6, 39.3 | 14.3* | 12.2, 16.4 | 34.5*               | 31.7, 37.3 | 12.1* | 10.2, 14.0 | 27.1*       | 24.4, 29.7 | 11.8* | 9.9, 13.7  | 28.1*                | 25.4, 30.7 | 13.3 | 11.3, 15.3 | 30.7*             | 28.0, 33.5 | 13.1* | 11.1, 15.1 |
| Front of pack labeling makes you feel? <sup>4</sup> (Safer to decide if the product is healthy)                                  | 27.5  | 24.9, 30.1 | 65.7* | 62.8, 68.5 | 30.0*               | 27.3, 32.7 | 67.4* | 64.6, 70.2 | 31.1*       | 28.4, 33.8 | 66.0* | 63.2, 68.9 | 31.9*                | 29.2, 34.7 | 66.1 | 63.3, 68.9 | 28.3*             | 25.6, 30.9 | 65.3* | 62.4, 68.1 |
| <b>Subjective Understanding</b>                                                                                                  |       |            |       |            |                     |            |       |            |             |            |       |            |                      |            |      |            |                   |            |       |            |
| Correct identification of total number of high critical nutrients <sup>5</sup>                                                   | 52.4  | 49.5, 55.4 | 91.5* | 89.9, 93.2 | 13.6*               | 11.6, 15.6 | 88.5* | 86.6, 90.4 | 35.2*       | 32.4, 38.0 | 90.0* | 88.2, 91.8 | 68.0*                | 65.3, 70.8 | 95.8 | 94.6, 97.0 | 54.7*             | 51.7, 57.6 | 89.8* | 87.9, 91.6 |

\* Significant difference (p < 0.05) versus GDA.

GDA, Guideline Daily Allowance; WL, Warning Label.

The information presented refer differences in percentage (95%CI) of the population that respond to the category mentioned of each product after implementation of WL vs GDA.

<sup>1</sup>Adjusted percentages obtained through logistic regression models, as predictive variables were included age group, study stage and their interactions, besides, SES, nutrition knowledge and BMI, through predictive margins.

<sup>2</sup>Based on scales from 1 to 7 recoded to 2 categories. The categories presented represent the highest category of each variable.

<sup>3</sup>Based on scales from 1 to 7 recoded to 2 categories. The categories presented represent the lowest category of each variable.

<sup>4</sup>Based on a scale of 3 categories recoded to 2 categories. The category presented represent the highest category of each variable.

<sup>5</sup>Two categories variable. The category represents the correct identification of high amounts of fat, sugars, calories/energy and sodium.
