# Supplementary material for: Perception and Understanding of Guideline Daily Amount and Warning Labeling among Mexican Adults during the Law Modification Period
Source: Nutrients. 2022 Aug 18;14(16):3403. doi: 10.3390/nu14163403 (PMC9415154; doi:10.3390/nu14163403)
Supplement: Supplementary file 1 [file nutrients-14-03403-s001.zip]

Archive with 4 entries (4 files):
- Figure S1. Products utilized in the study.pdf
- File S1. Questionnaire used in both evaluations.pdf
- Table S1. Change in perception and subjective understanding among GDA and WL by food category.pdf
- Table S2. Knowledge of sweetener∩s and perception of the sweetener and caffeine legends.pdf
